# Supplementary material for: An Automated, Experimenter-Free Method for the Standardised, Operant Cognitive Testing of Rats
Source: PLOS journal article supplement (doi:10.1371/journal.pone.0169476), 2017-01-06
Supplement: S1 (10.1371/journal.pone.0169476.s001) [file journal.pone.0169476.s001]

1    **An automated, experimenter-free method for the standardised, operant cognitive**  
2    **testing of rats.**

3  
4    Rivalan M\*, Munawar H, Fuchs A, Winter Y\*.

5  
6    Department of Biology, Humboldt University of Berlin, Berlin, Germany

7    \* Corresponding authors

8    E-mails: marion.rivalan@charite.de (MR), york.winter@charite.de (YW)

9  
10  
11    **S1 Table. (A)** Details of the protocols described in Oomen et al. (2013), Talpos et al. (2010) and our study.  
12    **(B)** Detailed list of differences between the protocol described in Talpos et al. (2010) and the current study  
13    during the TUNL acquisition task and the TUNL probe test.

| Oomen et al. 2013                                                     |                                                                                                                                                                                                                                                                                                                                                                                                                                                                                                                                                                                                                                                                                                                                                                                     | Talpos et al. 2010    |                                                                                                                                                                                                                                                                                                                                 | Current study                                 |                                                                                                                                                                                                                                                                                                                                                                                                                                                                                                                                                               |
|-----------------------------------------------------------------------|-------------------------------------------------------------------------------------------------------------------------------------------------------------------------------------------------------------------------------------------------------------------------------------------------------------------------------------------------------------------------------------------------------------------------------------------------------------------------------------------------------------------------------------------------------------------------------------------------------------------------------------------------------------------------------------------------------------------------------------------------------------------------------------|-----------------------|---------------------------------------------------------------------------------------------------------------------------------------------------------------------------------------------------------------------------------------------------------------------------------------------------------------------------------|-----------------------------------------------|---------------------------------------------------------------------------------------------------------------------------------------------------------------------------------------------------------------------------------------------------------------------------------------------------------------------------------------------------------------------------------------------------------------------------------------------------------------------------------------------------------------------------------------------------------------|
| Stage 1.<br>Habituation                                               | 1. Minimum 2 sessions per rat<br>2. pellets added manually in the food tray<br>3. Criterion: consuming all rewards in one session<br>4. No task related software is active during habituation<br>5. Session duration: 30 min                                                                                                                                                                                                                                                                                                                                                                                                                                                                                                                                                        | Habituation           | 1. Rats manually placed in TS chamber and food pellets were placed manually in the food receptacle and on the shelf<br>2. TS not activated but mask was attached to the TS<br>3. Session Duration: 20 min                                                                                                                       | Training 1 – Habituation/ exploration phase   | 1. All 15 response windows lit<br>2. Image response time 15 min (max) or until nose poke<br>3. Condition for reward: no poke within 15 min, all windows turn off and 1 pellet is delivered or one poke on lit window, all windows turn off and 2 pellets are delivered<br>4. Sorter deactivated: Gates are open (all rats can enter at once into TS chamber)<br>5. Unlimited trials<br>6. ITI: 30 sec<br>7. Session duration: 24h                                                                                                                             |
| Stage 2.<br>Training to associate stimuli on the screen with a reward | 1. All 15 response windows lit<br>Image response time 30 sec or until nose poke<br>2. Condition for reward: no response for 30 sec, windows go black 1 pellet delivered. Nose poke on lit window, 3 pellets delivered<br>3. Criterion: 60 trials within 60 min<br>4. Session duration: 60 min or 100 trials                                                                                                                                                                                                                                                                                                                                                                                                                                                                         | Initial touch all lit | 1. All response windows lit<br>2. Image response time 30sec<br>3. Condition for reward: no response for 30 sec, windows go black 1 pellet delivered. Nose poke on lit window, 3 pellets delivered<br>4. Criterion: 100 trials in one session (no time cut-off) only 1 session was given per rat                                 | Training 2 – Initial touch                    | 1. All 15 response windows lit<br>2. Image response time 30 sec or until nose poke<br>3. Condition for reward: no response for 30 sec, windows go black 1 pellet delivered. Nose poke on lit window, 2 pellets delivered<br>4. Criterion to next phase: 17 trials per session in two sessions<br>5. Session duration: 10 min or 17 trials<br>6. Sorter activated (only one rat at a time is allowed to enter the TS chamber)<br>7. 14 Session max in 24h<br>8. ITI: 20 sec<br>9. Min intersession interval: 30 min                                            |
| Stage 3.<br>Training to touch stimuli on the screen for a reward      | Stage 3 consists in three different phases (i), (ii), (iii):<br>(i) Repeat the procedure as detailed in (stage 2). Start this stage by subjecting animals to this task with all 15 response windows activated simultaneously until criterion is reached.<br>(ii) Next, repeat stage 3, but use an adapted version of the task in which a smaller response location is used that consists of four (2 × 2) adjacent locations instead of all 15 windows. The location of this square on the screen should be selected pseudo-randomly across trials.<br>(iii) After animals have reached criterion (same as stage 2), repeat stage 3 a third time; use a single window as the active response location. Proceed to stage 4 when the animals have reached criterion (same as stage 2). | Must touch all lit    | 1. All response windows lit<br>2. Image response time was until nose poke<br>3. Condition for reward: nose poke on lit window, 1 pellet delivered<br>4. Session duration: 30min or 100 trials<br>5. ITI = 5sec<br>6. 3 sessions per animal                                                                                      | Training 3 – Touch all lit windows            | 1. All 15 response windows lit until nose poke<br>2. Image response time was until nose poke<br>3. Condition for reward: nose poke on any of the 15 lit windows = 1 pellet delivered<br>4. Criterion to next phase: 50 trials per session in two sessions<br>5. Session duration: 30 min or 50 trials<br>6. Sorter activated (only one rat at a time is allowed to enter the TS chamber)<br>7. 6 sessions max in 24h<br>8. ITI: 20 sec<br>9. Min intersession interval: 2.5 h                                                                                 |
|                                                                       |                                                                                                                                                                                                                                                                                                                                                                                                                                                                                                                                                                                                                                                                                                                                                                                     |                       |                                                                                                                                                                                                                                                                                                                                 | Training 4 – Touching one lit window          | 1. One response window lit (until nose poke) per trial (random location between trials)<br>2. Image response time was until nose poke<br>3. Condition for reward: nose poke on lit window, 1-pellet delivered<br>4. Criterion to next phase: 50 trials per session in two consecutive sessions<br>5. Session duration: 30 min or 50 trials<br>6. Sorter activated (only one rat at a time is allowed to enter the TS chamber)<br>7. 6 sessions max in 24h<br>8. ITI: 20 sec<br>9. Min intersession interval: 2.5 h                                            |
| Stage 4.<br>Training to initiate trials                               | 1. One response window lit per trial (random)<br>2. Image response time was until nose poke<br>3. Condition for reward: nose poke on lit window, 1-pellet delivered<br>4. Criterion: 60 trials within 60 min<br>5. Session duration: 60min or 100 trials<br>6. Rats received a free pellet at the start of a session so that they initiated the trials                                                                                                                                                                                                                                                                                                                                                                                                                              | Must initiate         | 1. One response window lit per trial (random)<br>2. Image response time was until nose poke<br>3. Condition for reward: nose poke on lit window, 1-pellet delivered<br>4. ITI = 5sec<br>5. Session duration: 60min or 100 trials Only 8 response windows were used.<br>6. Blank pokes were not punished or rewarded. ITI = 5sec | Training 5 – Initiating                       | 1. One response window lit per trial (random)<br>2. Image response time was until nose poke<br>3. Condition for reward: nose poke on lit window, 1-pellet delivered<br>4. Criterion to next phase: 50 trials per session in two sessions<br>5. Session duration: 30 min or 50 trials<br>6. Rats received a free pellet at the start of the session so that they initiated the trials<br>7. Sorter activated (only one rat at a time is allowed to enter the TS chamber)<br>8. 4 Sessions max in 24h<br>9. ITI: 20 sec<br>10. Min intersession interval: 2.5 h |
| Stage 5.<br>Punishment for incorrect responses                        | Schedule same as stage 4 (Training to initiate trials) but the criterion is ≥ 80% correct within 60 min on two consecutive sessions                                                                                                                                                                                                                                                                                                                                                                                                                                                                                                                                                                                                                                                 |                       |                                                                                                                                                                                                                                                                                                                                 | Training 6 – Punishment for incorrect choices | Schedule same as training 5 (Initiating) but the criterion to next phase is to complete 50 trials with ≥80% correct choices on two consecutive sessions.                                                                                                                                                                                                                                                                                                                                                                                                      |

Notes S1-A Table: TS: Touchscreen. In Training 4 and Training 6, the criteria required to reach the next phase are more stringent than during the other training phases (2, 3 and 5), with 50 trials/session to be completed during two consecutive sessions

|                       |                                 | ITI (s) | Delay sample to choice phase (s)      | Max no. of trials | Size of stimulus (cm)              | Separation between stimuli         | Start of a session | No. of stimuli on screen                                       |
|-----------------------|---------------------------------|---------|---------------------------------------|-------------------|------------------------------------|------------------------------------|--------------------|----------------------------------------------------------------|
| TUNL acquisition task | Current study (Fig. 4)          | 20      | 2 (recommended by Oomen et al., 2013) | 84                | 3.3x3.3 (as in Oomen et al., 2013) | Adj (0), Med (1, 2), Max (3)       | Automated          | 3x5 (as in Oomen et al., 2013)                                 |
|                       | Talpos 2010 (Fig4)              | 10      | 6                                     | 64                | 4.25 x 4.25                        | Adj (0), Med (1), Max (2)          | Manual             | 3x4 (windows of the top row were never lit=8 locations used)   |
| TUNL probe test       | Current study (Fig. 5A; Fig. 6) | 20      | 2 and 6                               | 84                | 3.3x3.3 (as in Oomen et al., 2013) | Adj (0), Med (1, 2), Max (3)       | Automated          | 3x5 (as in Oomen et al., 2013)                                 |
|                       | Talpos 2010 (Fig.6)             | 10      | 1 and 6                               | 64                | 2x2                                | Adj (<3), Med (3 ≥ n <6), Max (≥6) | Manual             | 3x7 (windows of the top row were never lit =14 locations used) |

20 Notes S1-B Table: Adj: adjacent, Med: medium, Max: maximum
