# Supplementary material for: An Automated, Experimenter-Free Method for the Standardised, Operant Cognitive Testing of Rats
Source: PLOS journal article supplement (doi:10.1371/journal.pone.0169476), 2017-01-06
Supplement: S3 (10.1371/journal.pone.0169476.s003) [file journal.pone.0169476.s003]

1    **An automated, experimenter-free method for the standardised, operant cognitive**  
2    **testing of rats.**

3

4    Rivalan M\*, Munawar H, Fuchs A, Winter Y\*.

5

6    Department of Biology, Humboldt University of Berlin, Berlin, Germany

7    \* Corresponding authors

8    E-mails: marion.rivalan@charite.de (MR), york.winter@charite.de (YW)

9 **S3 Table.** Comparison of results between the experimental groups of this study.

10

| Variable                                 | Training phase | Measured parameters (per individual)                                  | Statistical test                                                     | Outcome                 |
|------------------------------------------|----------------|-----------------------------------------------------------------------|----------------------------------------------------------------------|-------------------------|
| general activity and motivation to enter | Training1      | total number of visits in 24h                                         | Mann-Whitney w. bonferroni correction<br>U=min(22.5,13.5)=13.5, n.s. | G1=G2                   |
| general activity and motivation to enter | Training1      | mean duration of visits during dark (=active) phase                   | Mann-Whitney w. bonferroni correction<br>U=min(12, 24)=12, n.s.      | G1=G2                   |
| activity related to reward               | Training1      | total number of trials in 24h                                         | N.A                                                                  | G1 (686)< G2 (880)      |
| activity related to reward               | Training1      | number of trials with windows touch (%) in 24h                        | N.A                                                                  | G1 (97.6%) = G2 (98.3%) |
| motivation to enter                      | Training1      | latency to first entry in the operant chamber                         | Mann-Whitney w. bonferroni correction<br>U=min(6,30)=6, n.s.         | G1=G2                   |
| general activity and motivation to enter | Training1      | total number of visits during dark (=active) phase                    | Mann-Whitney w. bonferroni correction<br>U=min(21,15)=15, n.s.       | G1=G2                   |
| motivation to train                      | Training2      | total number of sessions to reach 80% correct touches                 | Mann-Whitney w. bonferroni correction<br>U=(11.5,24.5)=11.5, n.s.    | G1=G2                   |
| motivation to exit                       | Training2      | mean latency to exit the operant chamber after a session is completed | Mann-Whitney w. bonferroni correction<br>U=(22,14)=14, n.s.          | G1=G2                   |
| motivation to train                      | Training3      | total number of sessions to reach 80% correct touches                 | Mann-Whitney w. bonferroni correction<br>U=min(6,30)=6, n.s.         | G1=G2                   |
| motivation to exit                       | Training3      | mean latency to exit the operant chamber after a session is completed | Mann-Whitney w. bonferroni correction<br>U=(19,17)=17, n.s.          | G1=G2                   |
| motivation to train                      | Training4      | total number of sessions to reach 80% correct touches                 | Mann-Whitney w. bonferroni correction<br>U=(24, 12)=12, n.s.         | G1=G2                   |
| motivation to perform                    | Training4      | total number of incorrect touches (last session)                      | Mann-Whitney w. bonferroni correction<br>U=(17.5,18.5)=17.5, n.s.    | G1=G2                   |
| motivation to exit                       | Training4      | mean latency to exit the operant chamber after a session is completed | Mann-Whitney w. bonferroni correction<br>U=(31,5)=5, n.s.            | G1=G2                   |
| motivation to train                      | Training5      | total number of sessions to reach 80% correct touches                 | Mann-Whitney w. bonferroni correction<br>U=(27,9)=9, n.s.            | G1=G2                   |
| motivation to perform                    | Training5      | total number of incorrect touches (last session)                      | Mann-Whitney w. bonferroni correction<br>U=(10.5,25.5)=10.5, n.s.    | G1=G2                   |

|                                                                                   |            |                                                                       |                                                                                                                                                                                                                                                                                                                      |       |
|-----------------------------------------------------------------------------------|------------|-----------------------------------------------------------------------|----------------------------------------------------------------------------------------------------------------------------------------------------------------------------------------------------------------------------------------------------------------------------------------------------------------------|-------|
| motivation to exit                                                                | Training5  | mean latency to exit the operant chamber after a session is completed | Mann-Whitney w. bonferroni correction<br>U=(26,10)=10, n.s.                                                                                                                                                                                                                                                          | G1=G2 |
| motivation to train                                                               | Training6  | total number of sessions to reach 80% correct touches                 | Mann-Whitney w. bonferroni correction<br>U=(20,16)=16, n.s.                                                                                                                                                                                                                                                          | G1=G2 |
| motivation to perform                                                             | Training6  | total number of incorrect touches (last session)                      | Mann-Whitney w. bonferroni correction<br>U=(13,23)=13, n.s.                                                                                                                                                                                                                                                          | G1=G2 |
| motivation to exit                                                                | Training6  | mean latency to exit the operant chamber after a session is completed | Mann-Whitney w. bonferroni correction<br>U=(28,8)=8, n.s.                                                                                                                                                                                                                                                            | G1=G3 |
| acquisition learning                                                              | TUNL       | % correct (averaged per blocks)                                       | Mann-Whitney w. bonferroni correction<br>block1: U=(10,26)=10, n.s.<br>block2: U=(8,28)=8, n.s.<br>block3: U=(5,31)=5, 0.025<p<0.05<br>bonferroni correction p<0.0125<br>block4: U=(8,28)=8, n.s.                                                                                                                    | G1=G2 |
| acquisition learning                                                              | TUNL       | total number of correction trials per blocks                          | Mann-Whitney w. bonferroni correction<br>block1: U=(19,17)=17, n.s.<br>block2: U=(9,27)=9, n.s.<br>block3: U=(15,21)=15, n.s.<br>block4: U=(16,20)=16, n.s.                                                                                                                                                          | G1=G2 |
| effect of delay between phases and of the distance of the stimulus on performance | Probe test | % correct (averaged per separation distance and delays)               | Mann-Whitney w. bonferroni correction<br><u>separation 0</u><br>delay 2sec: U=(13,23)=13, n.s.<br>delay 6sec: U=(23,13)=13, n.s.<br><u>separation 1,2</u><br>delay 2sec: U=(10,26)=10, n.s.<br>delay 6sec: U=(1,35)=1, n.s.<br><u>separation 3</u><br>delay 2sec: U=(4,32)=4, n.s.<br>delay 6sec: U=(11,25)=11, n.s. | G1=G2 |
| motivation to collect reward                                                      | Probe test | mean latency to collect reward                                        | Mann-Whitney w. bonferroni correction<br><u>separation 0</u><br>delay 2sec: U=(3,33)=13, n.s.<br>delay 6sec: U=(22,14)=14, n.s.<br><u>separation 1,2</u><br>delay 2sec: U=(0,36)=0, n.s.<br>delay 6sec: U=(0,36)=0, n.s.<br><u>separation 3</u><br>delay 2sec: U=(6,36)=6, n.s.<br>delay 6sec: U=(16, 20)=16, n.s.   | G1=G2 |
| motivation to make a choice                                                       | Probe test | mean latency to "correct Image Response" (choice phase only)          | Mann-Whitney w. bonferroni correction<br><u>separation 0</u><br>delay 2sec: U=(22,14)=14, n.s.<br>delay 6sec: U=(23,13)=13, n.s.<br><u>separation 1,2</u><br>delay 2sec: U=(23,13)=13, n.s.<br>delay 6sec: U=(25,11)=11, n.s.<br><u>separation 3</u><br>delay 2sec: U=(31,5)=5, n.s.<br>delay 6sec: U=(27,9)=9, n.s. | G1=G2 |

|                                        |                   |                                                                          |                                                                                                                                      |                                |
|----------------------------------------|-------------------|--------------------------------------------------------------------------|--------------------------------------------------------------------------------------------------------------------------------------|--------------------------------|
| effect of previous trial on next trial | Interference test | %correct (averaged at "large" separation and 2s delay but different ITI) | Mann-Whitney w. bonferroni correction separation 3, delay 2 sec:<br>ITI 20 sec: U=(4,32)=45, p<0.025<br>ITI 15 sec: U=(7,29)=7, n.s. | G1>G2 (ITI20)<br>G1=G2 (ITI15) |
|----------------------------------------|-------------------|--------------------------------------------------------------------------|--------------------------------------------------------------------------------------------------------------------------------------|--------------------------------|

**Notes S3 Table:** Data from both experimental groups (G1 and G2) were compared for each training phase and for each variable assessed in order to test for consistency and repeatability of the behaviours expressed in this setup (Mann-Whitney U-test for independent samples). The Bonferroni procedure was applied to correct for the multiple testing between the two groups. Following Bonferroni correction, no differences between groups were significant (45 parameters compared in total) except in the Interference test where the % of correct choices (averaged at "large" separation and 2s delay) was higher in G1 than G2 (ITI=20 sec) but this was not the case with the ITI=15s. The latency before exiting the operant chamber was the averaged latency per session per animal during the entire training phase. No statistical analysis could be performed regarding animal responses during Training 1 (no individual identification). n.s.: non significant, N.A: non applicable. Further results not included in the table can be found in the main text but were not used for the group comparison.
